# Supplementary material for: Perfluorocarbon nanodroplets stabilized with cisplatin-prodrug-constructed lipids enable efficient tumor oxygenation and chemo-radiotherapy of cancer
Source: Royal Society of Chemistry journal article supplement (doi:10.1039/d0nr01476a), 2020-01-01
Supplement: d0nr01476a1.pdf [file d0nr01476a1.pdf]

## Supporting Information

### Perfluorocarbon Nanodroplets Stabilized with Cisplatin-Prodrug-Constructed Lipids Enables Efficient Tumor Oxygenation and Chemo-Radiotherapy of Cancer

Li Yao<sup>a</sup>, Liangzhu Feng<sup>\*b</sup>, Danlei Tao<sup>b</sup>, Huiquan Tao<sup>b</sup>, Xiaoyan Zhong<sup>b</sup>, Chao Liang<sup>b</sup>, Yujie Zhu<sup>b</sup>, Bing Hu<sup>a</sup>, Zhuang Liu<sup>\*b</sup>, Yuanyi Zheng<sup>\*a</sup>

a. Department of Ultrasound in Medicine, Shanghai Jiao Tong University Affiliated Sixth People's Hospital, Shanghai Institute of Ultrasound in Medicine, Shanghai 200233, P.R. China

E-mail: zhengyuanyi@163.com

b. Jiangsu Key Laboratory for Carbon-Based Functional Materials & Devices, Institute of Functional Nano & Soft Materials (FUNSOM), Soochow University, 199 Ren'ai Road, Suzhou, 215123, Jiangsu, PR China

E-mail: lzfeng@suda.edu.cn, [zliu@suda.edu.cn](mailto:zliu@suda.edu.cn)

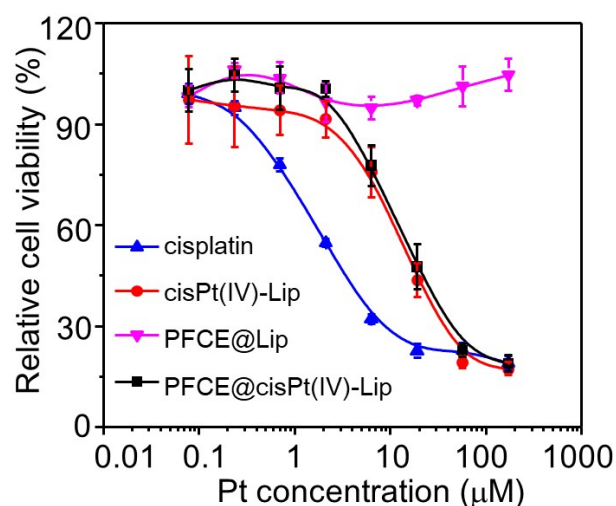

**Fig. S1** Relative cell viabilities of 4T1 cells treated with PFCE@cisPt(IV)-Lip, cisPt(IV)@Lip, PFCE@Lip and free cisplatin in hypoxia for 48 h via the standard CCK8 assay.
